# Supplementary material
Source: PubMed Central journal article supplement (PMC3057935)
Supplement: NIHMS248940-supplement-Supp_Table_S1.pdf [file NIHMS248940-supplement-Supp_Table_S1.pdf]

Supplementary Table 1. Description of gut bacterial species.

| No. | Bacterial species                                 | ATCC / DSM No. | Colonizing area in gut | Gram stain | Conditions           | Additional information                                |
|-----|---------------------------------------------------|----------------|------------------------|------------|----------------------|-------------------------------------------------------|
| 1   | <i>Streptococcus salivarius</i> subsp. salivarius | DSM 20560      | Ileum                  | Positive   | Aerobe               | Andrewes and Horder 1906                              |
| 2   | <i>Enterococcus faecalis</i>                      | ATCC 29212     | Ileum                  | Positive   | Aerobe               | (Andrewes and Horder) Schleifer and Kilpper-Balz      |
| 3   | <i>Klebsiella pneumoniae</i>                      | DSM 16609      | Ileum                  | Negative   | Aerobe               | (Schroeter 1886) Trevisan 1887                        |
| 4   | <i>Bacteroides fragilis</i>                       | DSM 2151       | Ileum                  | Negative   | Obligate anaerobe    | (Veillon and Zuber 1898) Castellani and Chalmers 1919 |
| 5   | <i>Bifidobacterium adolescentis</i>               | DSM 20083      | Colon                  | Positive   | Anaerobe             | Reuter 1963                                           |
| 6   | <i>Lactobacillus acidophilus</i>                  | DSM 20079      | Colon                  | Positive   | Facultative anaerobe | (Moro 1900) Hansen and Møcquot 1970                   |
| 7   | <i>Clostridium ramosum</i>                        | DSM 1402       | Colon                  | Positive   | Anaerobe             | (Veillon and Zuber 1898) Holderman et al. 1971        |
