# Supplementary material
Source: PubMed Central journal article supplement (PMC3057935)
Supplement: NIHMS248940-supplement-Supp_Table_S2.pdf [file NIHMS248940-supplement-Supp_Table_S2.pdf]

Supplementary Table 2. Identification of *S. aureus* and *E. coli* proteins in IgE immune complexes**(A) *S. aureus* proteins**

| Patient | Reactive protein                                                                          | Species                      | Accession number | MW of protein (Da) | Score | Database   |
|---------|-------------------------------------------------------------------------------------------|------------------------------|------------------|--------------------|-------|------------|
| A       | DNA-binding protein HU                                                                    | <i>S. aureus</i>             | DBH_STAAC        | 9620               | 254   | Swiss-Prot |
|         | Flagellin                                                                                 | <i>Shigella flexneri</i>     | FLIC_SHIFL       | 56603              | 76    | Swiss-Prot |
|         | Dihydrolipoyllysine-residue acetyltransferase component of pyruvate dehydrogenase complex | <i>S. aureus</i>             | ODP2_STAAC       | 46382              | 56    | Swiss-Prot |
|         | DNA-binding protein HU-1                                                                  | <i>Bacillus halodurans</i>   | DBH1_BACHD       | 9657               | 56    | Swiss-Prot |
|         | Ribosomal RNA small subunit methyltransferase                                             | <i>Mycobacterium marinum</i> | RSMH_MYCMM       | 37524              | 55    | Swiss-Prot |
|         | Regulator of ribonuclease activity A                                                      | <i>Pseudomonas syringae</i>  | RRAA_PSE14       | 17861              | 51    | Swiss-Prot |

**(B) *E. coli* proteins**

| Patient | Reactive protein                               | Species                                        | Accession number                     | MW of protein (Da) | Score | Database   |            |
|---------|------------------------------------------------|------------------------------------------------|--------------------------------------|--------------------|-------|------------|------------|
| A       | Flagellin                                      | <i>Shigella flexneri</i>                       | FLIC_SHIFL                           | 56603              | 675   | Swiss-Prot |            |
|         | 50S ribosomal protein L17                      | <i>E. coli</i>                                 | RL17_ECO24                           | 14414              | 225   | Swiss-Prot |            |
|         | Glyceraldehyde-3-phosphatase dehydrogenase A   | <i>E. coli</i>                                 | G3P1_ECO57                           | 35684              | 147   | Swiss-Prot |            |
|         | Flagellin                                      | <i>Salmonella berta</i>                        | FLIC_SALBE                           | 53245              | 141   | Swiss-Prot |            |
|         | 30S ribosomal protein S4                       | <i>E. coli</i>                                 | RS4_ECO24                            | 23513              | 115   | Swiss-Prot |            |
|         | Flagellin                                      | <i>Bordetella bronchiseptica</i>               | FLAA_BORBR                           | 40508              | 84    | Swiss-Prot |            |
|         | 30S ribosomal protein S4                       | <i>Aeromonas hydrophila</i>                    | RS4_AERHH                            | 23507              | 77    | Swiss-Prot |            |
|         | 30S ribosomal protein S4                       | <i>Alkaliphilus metalliredigens</i>            | RS4_ALKMQ                            | 23616              | 63    | Swiss-Prot |            |
|         | 50S ribosomal protein L17                      | <i>Anaeromyxobacter dehalogenans</i>           | RL17_ANAD2                           | 18468              | 58    | Swiss-Prot |            |
|         | Dihydroxy-acid dehydratase                     | <i>Corynebacterium kroppenstedtii</i>          | ILVD_CORK4                           | 65348              | 55    | Swiss-Prot |            |
|         | 30S ribosomal protein S5                       | <i>E. coli</i>                                 | RS5_ECO24                            | 17592              | 55    | Swiss-Prot |            |
|         | Chromosomal replication initiator protein dnaA | <i>Helicobacter pylori</i>                     | DNAA_HELPH                           | 51526              | 52    | Swiss-Prot |            |
|         | Dihydroxy-acid dehydratase                     | <i>Polaromonas naphthalenivorans</i>           | ILVD_POLNA                           | 59238              | 51    | Swiss-Prot |            |
|         | B                                              | Flagellin                                      | <i>Shigella flexneri</i>             | FLIC_SHIFL         | 56603 | 403        | Swiss-Prot |
|         |                                                | Flagellin                                      | <i>Salmonella berta</i>              | FLIC_SALBE         | 53245 | 234        | Swiss-Prot |
|         |                                                | 30S ribosomal protein S4                       | <i>Aeromonas hydrophila</i>          | RS4_AERHH          | 23507 | 83         | Swiss-Prot |
|         |                                                | 30S ribosomal protein S4                       | <i>Alkaliphilus metalliredigens</i>  | RS4_ALKMQ          | 23616 | 67         | Swiss-Prot |
|         |                                                | Bifunctional protein pyrR                      | <i>Corynebacterium efficiens</i>     | PYRR_COREF         | 21002 | 53         | Swiss-Prot |
|         |                                                | Chromosomal replication initiator protein dnaA | <i>Mannheimia Succiniciproducens</i> | DNAA_MANSM         | 51806 | 53         | Swiss-Prot |
|         |                                                | 50S ribosomal protein L16                      | <i>E. coli</i>                       | RL16_ECO24         | 15271 | 52         | Swiss-Prot |
| C       | Flagellin                                      | <i>Shigella flexneri</i>                       | FLIC_SHIFL                           | 56603              | 400   | Swiss-Prot |            |
|         | Flagellin                                      | <i>Salmonella berta</i>                        | FLIC_SALBE                           | 53245              | 148   | Swiss-Prot |            |
|         | 50S ribosomal protein L2                       | <i>E. coli</i>                                 | RL2_ECO24                            | 29958              | 87    | Swiss-Prot |            |
|         | 50S ribosomal protein L17                      | <i>E. coli</i>                                 | RL17_ECO24                           | 144414             | 78    | Swiss-Prot |            |
|         | Elongation factor G                            | <i>Lactobacillus delbrueckii</i>               | EFG_LACDA                            | 76564              | 78    | Swiss-Prot |            |
|         | Ribose-5-phosphate isomerase A                 | <i>Photorhabdus luminescens</i>                | RPIA_PHOLL                           | 23224              | 53    | Swiss-Prot |            |
|         | Dihydroxy-acid dehydratase                     | <i>Cytophaga hutshinsonii</i>                  | ILVD_CYTH3                           | 60159              | 51    | Swiss-Prot |            |
| D       | Flagellin                                      | <i>Shigella flexneri</i>                       | FLIC_SHIFL                           | 56603              | 256   | Swiss-Prot |            |
|         | Flagellin                                      | <i>Salmonella berta</i>                        | FLIC_SALBE                           | 53245              | 87    | Swiss-Prot |            |
|         | 50S ribosomal protein L16                      | <i>E. coli</i>                                 | RL16_ECO24                           | 15271              | 57    | Swiss-Prot |            |
